# Supplementary material for: Handmade frameless levonorgestrel-releasing intrauterine system for Chinese patients
Source: Research Square preprint supplement (doi:10.21203/rs.3.rs-6633463/v1), 2025-05-19
Supplement: Supplementary file 1 [file 844cfe2424405712a08beb7c.pdf]

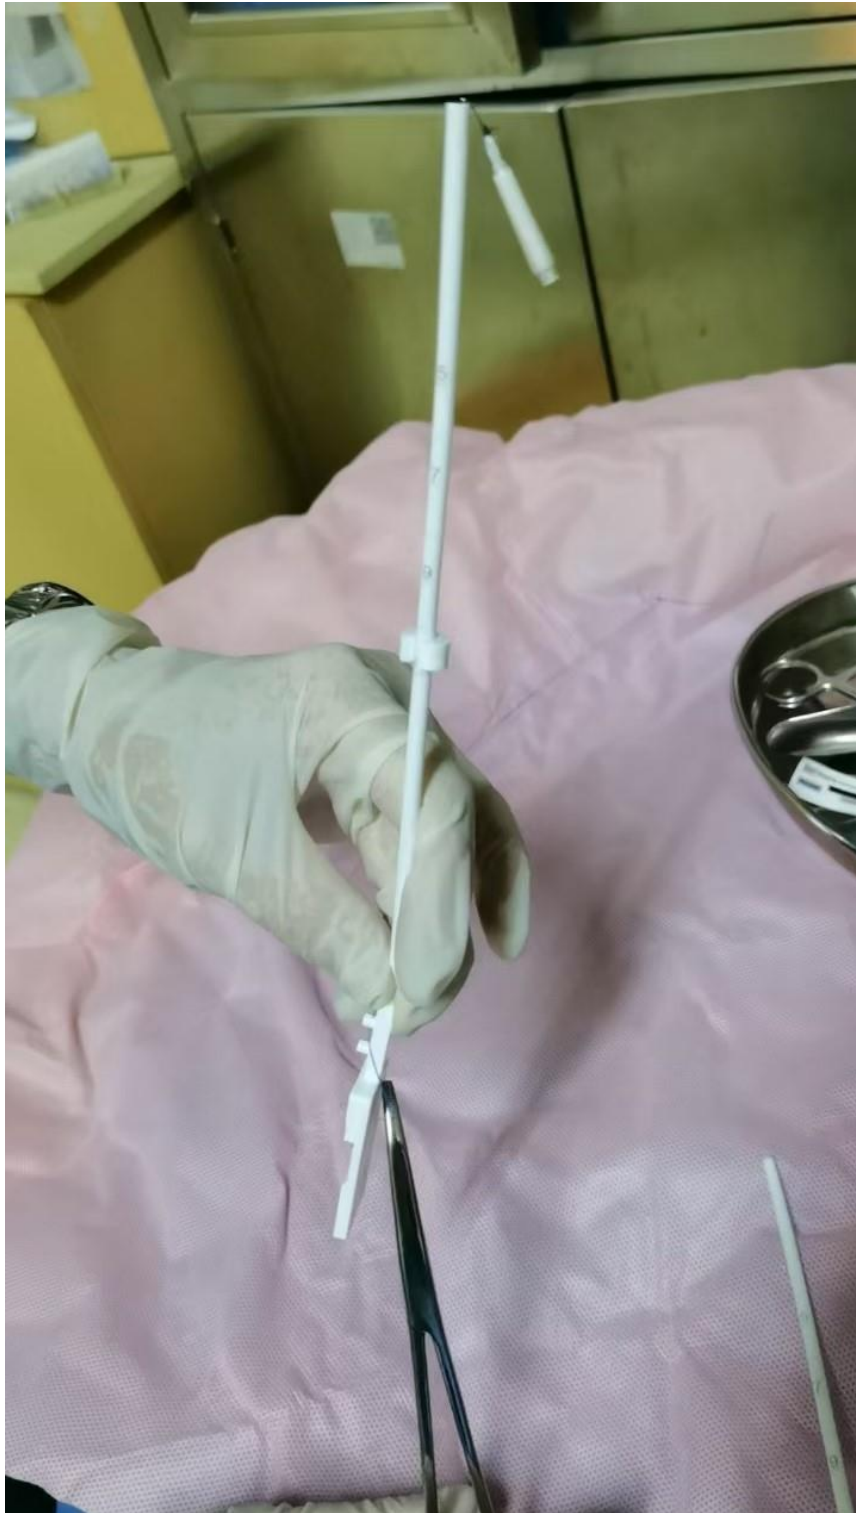

Supplementary Figure: The GyneFix-LNG-IUS is inserted into the GyneFix IUD's placement support and prepared for insertion into the uterine cavity
